# Supplementary material
Source: Elsevier journal article supplement (https://www.sciencedirect.com/science/article/pii/S1888441521000539)
Supplement: mmc1 [file S1888441521000539:mmc1.doc]

***Datos demográficos (4 items)***

| **1. Edad** |
| --- |
| **2. Sexo** |
| Varón |
| Mujer |
| **3. Lugar de trabajo** |
| Hospital de primer nivel (Centro referencia) |
| Hospital de segundo nivel (250.000 hab) |
| Hospital comarcal (100.000 hab) |
| Clínica sanidad privada |
| **4. Especialidad que realiza** |
| - *Traumatología* |
| - *Cirugía de cadera* |
| - *Cirugía de rodilla* |
| - *Cirugía de tobillo y pié* |
| - *Cirugía miembro superior* |
| - *Cirugía raquis* |
| - Médico interno residente |

**Opinion general y valoración de la cirugía (11 items)**

**Opciones de respuesta:**

1. *Totalmente en desacuerdo (1)*
2. *En desacuerdo (2)*
3. *Ni de acuerdo ni en desacuerdo (3)*
4. *De acuerdo (4)*
5. *Totalmente de acuerdo (5)*

| 1. Siempre hay que retirar los implantes en niños |
| --- |
| 1. Siempre hay que retirar los implantes en gente joven (< 40 años) |
| 1. Mantener el implante aumenta el riesgo de fractura |
| 1. Es más seguro mantener implantes de titanio que implantes de acero |
| 1. La retirada del implante mejora un dolor o déficit funcional no explicado por otra causa |
| 1. Mantener los implantes aumentan el riesgo de infección, alergia o malignidad |
| 1. La retirada de implantes conlleva costes innecesarios |
| 1. Retirar el implante lesiona los tejidos blandos mas que mantenerlo |
| 1. La retirada de material de osteosíntesis no está bien pagada (sanidad privada) |
| 1. La retirada del implante es siempre una cirugía al alcance de un residente pequeño |
| 1. La retirada del implante es siempre una cirugía al alcance de un residente mayor |

**Preguntas sobre tendencia de retirada por tipo de implante y localización (17 items)**

1. **Nunca**
2. **A veces**
3. **Con frecuencia**
4. **Siempre**
5. **Sin opinión**

| **En su opinión, ¿cree que los siguientes implantes deberían ser retirados?** |
| --- |
| 1. Placa clavícula |
| 1. Placas de húmero proximal |
| 1. Placas de húmero diafisario |
| 1. Clavo intramedular de húmero |
| 1. Placas de húmero distal |
| 1. Banda a tensión en olécranon |
| 1. Placas en radio diafisario en niños/adolescentes |
| 1. Placas en radio-cúbito diafisario en adultos |
| 1. Placa volar de radio distal |
| 1. Clavos elásticos en los niños (fémur y/o tibia) |
| 1. Clavo cefalo-medular (fracturas peritrocantéreas) |
| 1. Clavo intramedular de fémur (fractura diafisarias) |
| 1. Clavo/Placa fémur distal |
| 1. Clavo intramedular de tibia |
| 1. Placa tibia proximal o distal |
| 1. Agujas de kirschner y cerclaje alambre en rótula |
| 1. Placa peroné distal |

**Ideas y hábitos personales (12 items)**

1. *Si*
2. *No*

*1. INDICACIONES*

| **1. ¿Por que razón retira usted habitualmente los implantes de osteosíntesis?** |
| --- |
| Económica |
| Porque lo he aprendido así |
| Sin razón específica |
| Mala experiencia manteniendo el implante |
| Para evitar futuras complicaciones (infección, carcinogénesis…) |
| Preferencia del cirujano |
| Para evitar una fractura peri-implante |
| Para evitar futuros problemas quirúrgicos |
| Siempre retiro todos los implantes en los niños |
| A petición del paciente |
| Rotura del implante |
| Infección |
| En caso de molestias específicas |

| **2. En su opinión, ¿Que problemas del paciente pueden mejorar retirando el implante?** |
| --- |
| Presión en la piel o tejidos blandos |
| Dolor |
| Balance articular limitado |
| Inflamación |
| Parestesias |
| Problemas con la vida diaria |

QUIEN, CUANDO Y COMO

| **3. ¿Cuantos meses tras la consolidación de la fractura retira el implante?** |
| --- |
| Nunca retiro el implante |
| < 6 meses |
| Entre 6 - 12 meses |
| Entre 12 and 18 meses |
| Entre 18 - 24 meses |
| > 24 meses |

| **4. ¿Cree que hay diferencias entre retirar implantes de titanio y de acero inoxidable?** |
| --- |
| No experiencia con titanio/acero inoxidable |
| No diferencia Titanio / Acero inoxidable |
| Acero inoxidable es más fácil de retirar |
| Titanio es más fácil de retirar |

| **5. ¿Quién retira los implantes en su servicio?** |
| --- |
| El mismo cirujano que realiza la indicación |
| Cualquier cirujano del servicio |
| Cirujano de la Unidad Traumatología |
| Residente sin supervisión |
| Residente con supervisión |

| **6. ¿Cree que las complicaciones de las retiradas de implantes son debidas al nivel de experiencia del cirujano?** |
| --- |
| Si, a menudo |
| A veces |
| No, casi nunca |

| **7. ¿Cree que las complicaciones de las retiradas de implantes son debidas a la subespecialidad del cirujano?** |
| --- |
| Si, a menudo |
| A veces |
| No, casi nunca |

| **8. En su experiencia profesional, ¿en cuantas ocasiones la presencia de un implante de osteosíntesis a condicionado la indicación de una cirugía electiva? (p.e. artroplastia de cadera por clavo de fémur o artroplastia de rodilla por osteosíntesis de meseta tibial)** |
| --- |
| Ninguna |
| 1-5 |
| 6-10 |
| Más de 10 |

PLANIFICACIÓN

| **9. ¿En que recursos didácticos se apoya para afrontar retiradas de implantes que prevé dificultosas?** |
| --- |
| Acudo a la técnica quirúrgica del implante |
| Acudo a literatura/artículos de tipo “técnicas y trucos” |
| Improviso si se complica |

| **10. ¿De que material dispone para realizar las extracciones del material?** |
| --- |
| Ninguno específico, se improvisa con el material habitual de quirófano |
| Se solicita caja específica en caso de prever una extracción dificultosa |
| Disponemos de caja específica completa de extracción de material osteosíntesis |

COMPLICACIONES

| **11. ¿Qué complicaciones intraoperatorias ha observado con mas frecuencia?** |
| --- |
| Lesión nerviosa |
| Sangrado |
| Rotura del material durante su extracción |
| Fractura iatrogénica |
| Mala elección del instrumental de extracción |
| Fluoroscopia no planificada |
| Fusión fría |
| Alma de la cabeza del tornillo redondeada |
| Dificultad para encontrar el implante |
| Incisión más grande que la original |
| Cirugía más larga de lo planeado |
| Crecimiento de hueso sobre el implante |
| Imposibilidad para retirar parte o la totalidad de los implantes |
| Otras complicaciones |
| Nunca veo problemas |

| **12. ¿Qué complicaciones postoperatorias ha observado con mas frecuencia?** |
| --- |
| Lesión neurológica |
| Persistencia de la sintomatología |
| Refractura |
| No complicaciones |
| Sangrado |
| Cicatriz no satisfactoria |
| Infección de la herida quirúrgica |
| Otros |
